# Supplementary material for: Alpha-B-Crystallin overexpression is sufficient to promote tumorigenesis and metastasis in mice
Source: Springer Nature journal article supplement (doi:10.1186/s40164-022-00365-z), 2023-01-09

Additional file 1

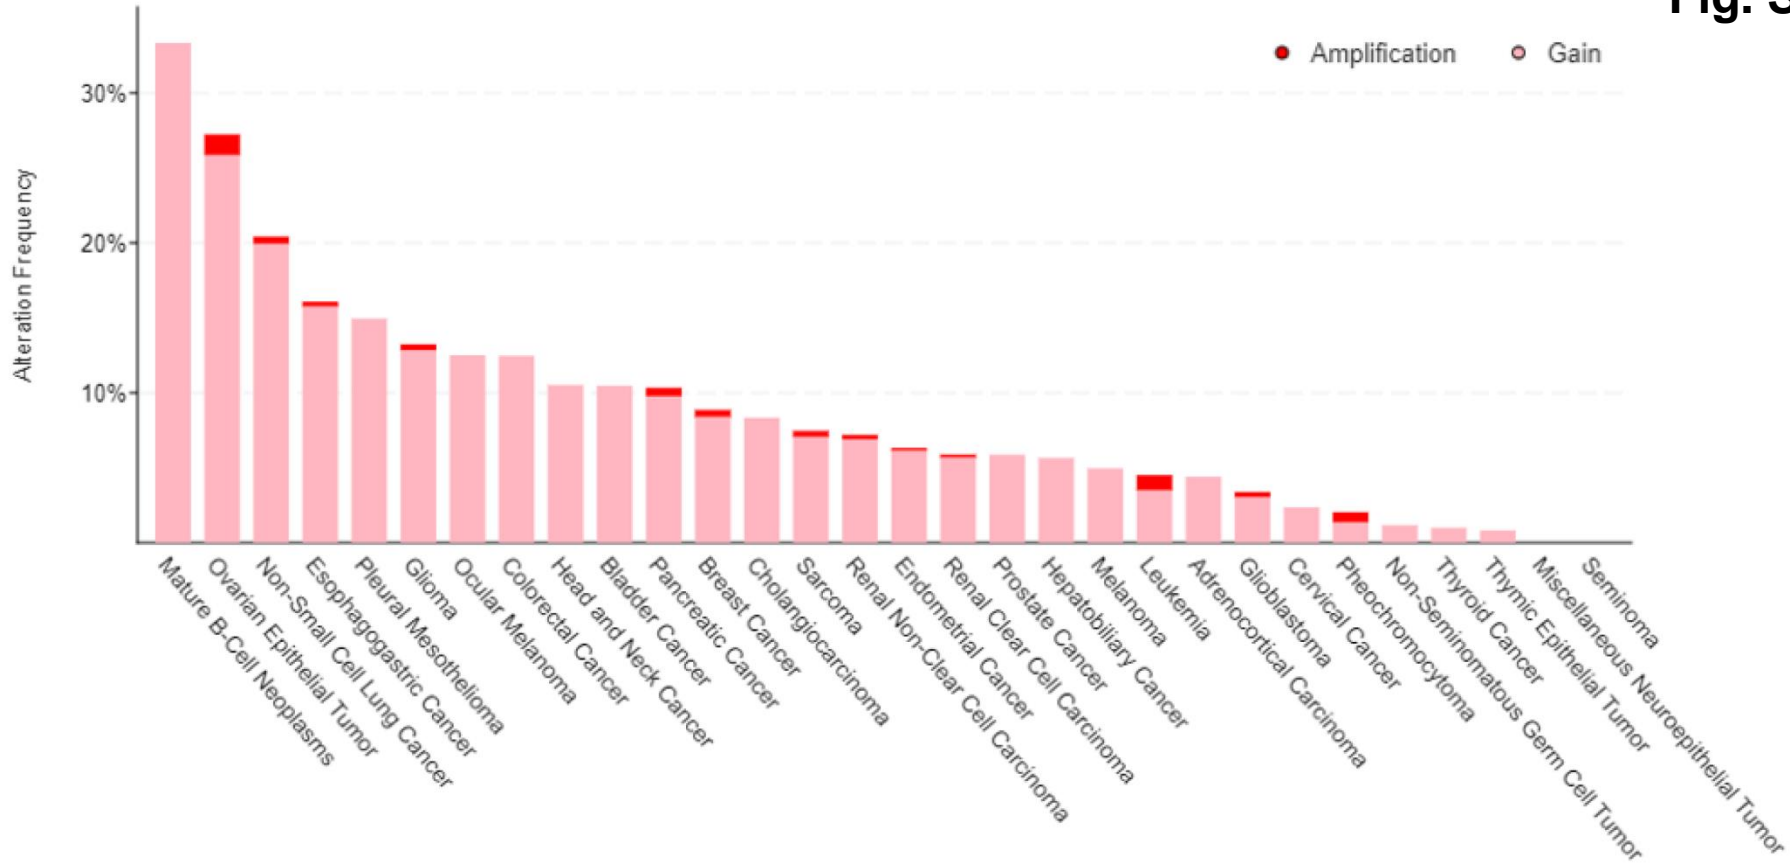

**b**

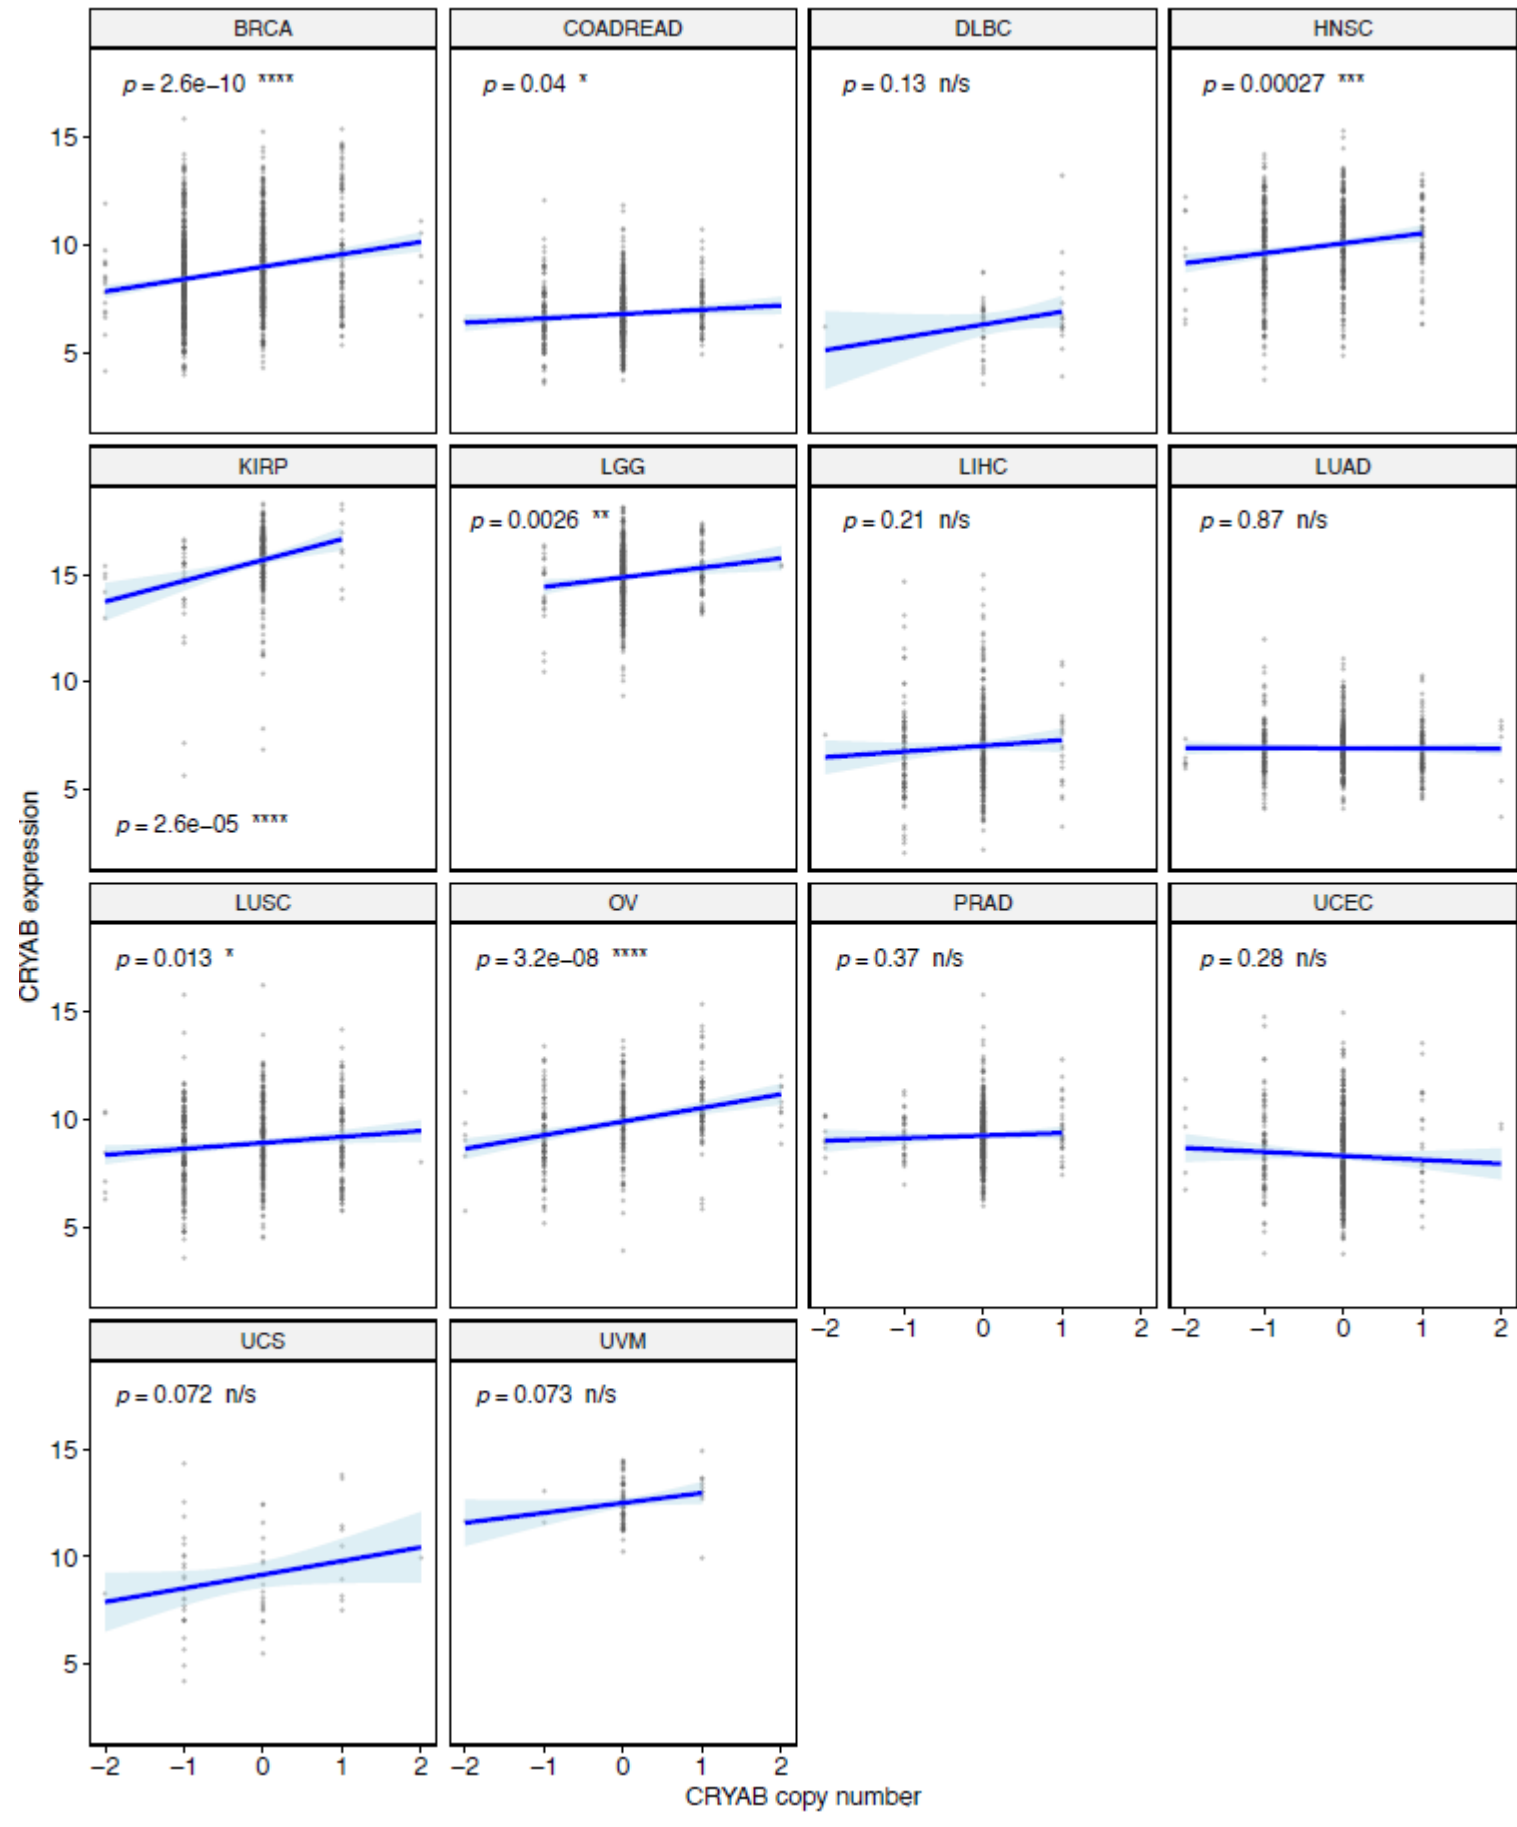

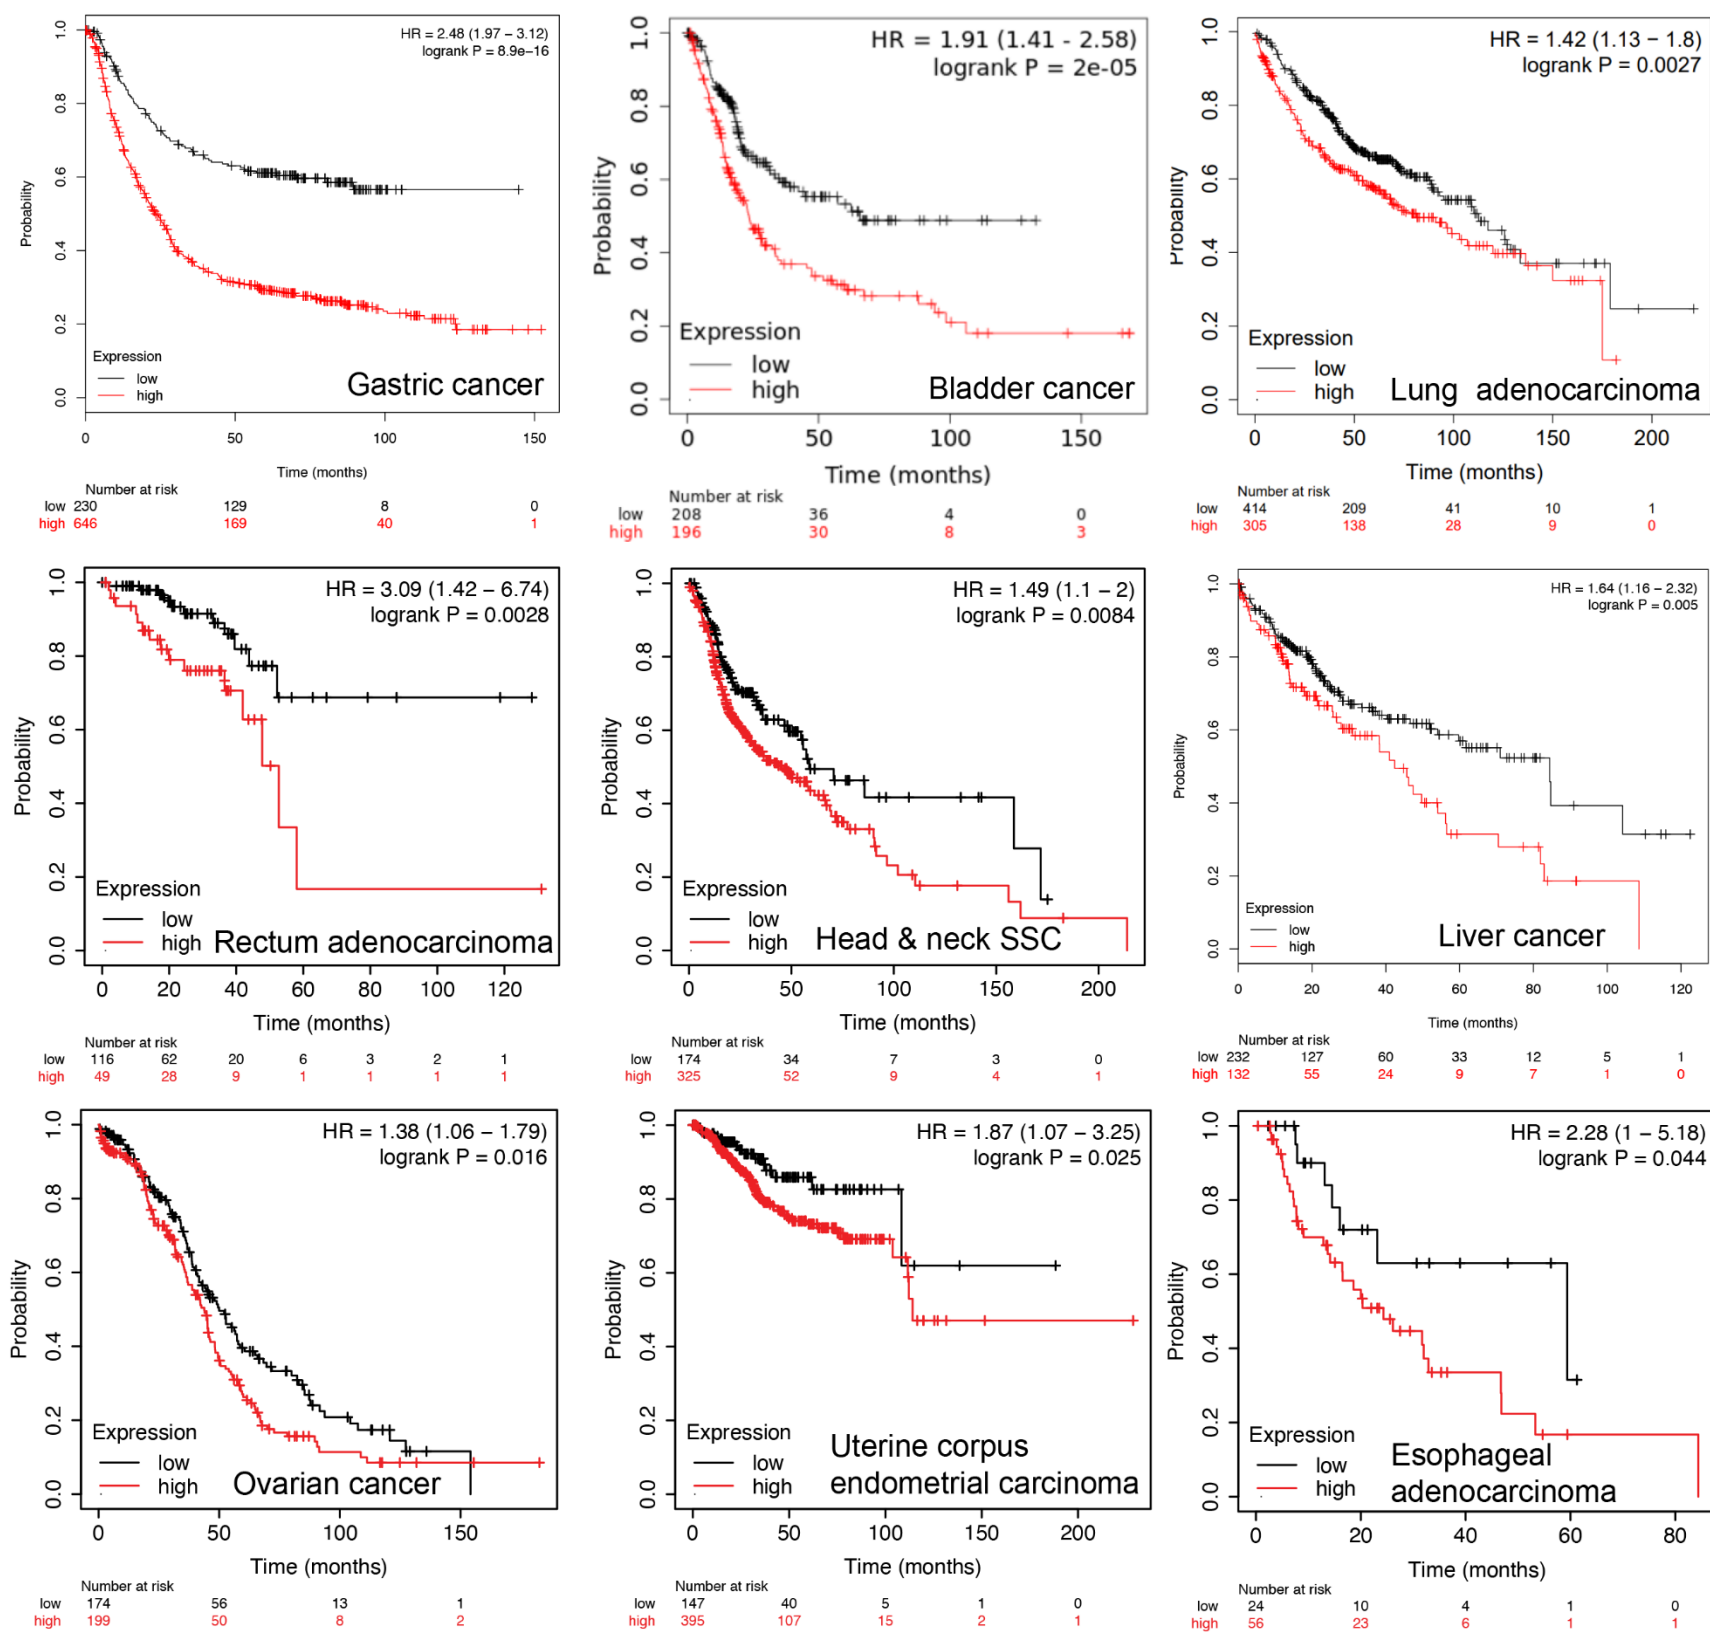



**a** 1 MDIAIHHPWIRRPFFPFHSPSRLFDQFFGEHLLESDFPTSTSLSPFYLRPPSFLRAPS<sub>W</sub> 60

MDIAIHHPWIRRPFFPFHSPSRLFDQFFGEHLLESDF T+TSLSPFYLRPPSFLRAPS<sub>W</sub>

1 MDIAIHHPWIRRPFFPFHSPSRLFDQFFGEHLLESDFSTATSLSPFYLRPPSFLRAPS<sub>W</sub> 60

61 FDTGLSEMRLEKDRFSVNLDVKHFSPEELKVKVLGDVIEVHGKHEERQDEHGFISREFHR 120

DTGLSEMRLEKDRFSVNLDVKHFSPEELKVKVLGDVIEVHGKHEERQDEHGFISREFHR

61 IDTGLSEMRLEKDRFSVNLDVKHFSPEELKVKVLGDVIEVHGKHEERQDEHGFISREFHR 120

121 KYRIPADVPLTITSSLSSDGVLTVNGPRKQVSGPERTIPITREEKPAVTAAPKK 175

KYRIPADVPLTITSSLSSDGVLTVNGPRKQVSGPERTIPITREEKPAV AAPKK

121 KYRIPADVPLTITSSLSSDGVLTVNGPRKQVSGPERTIPITREEKPAVAAPKK 175

**b**

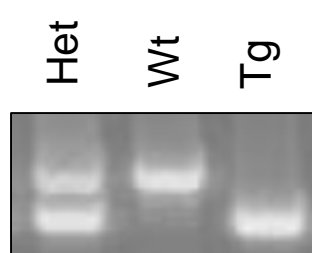

**c**

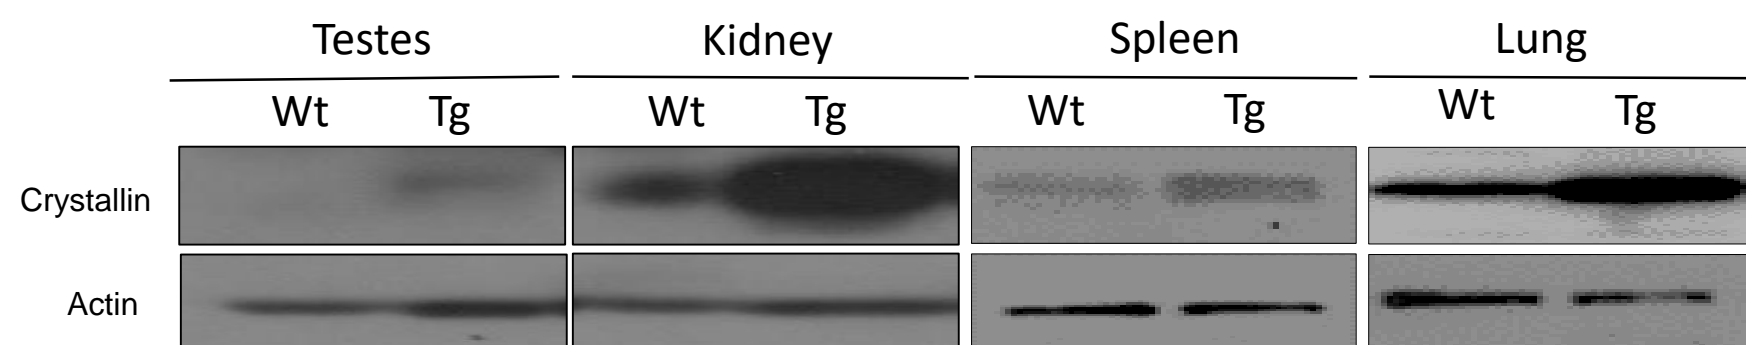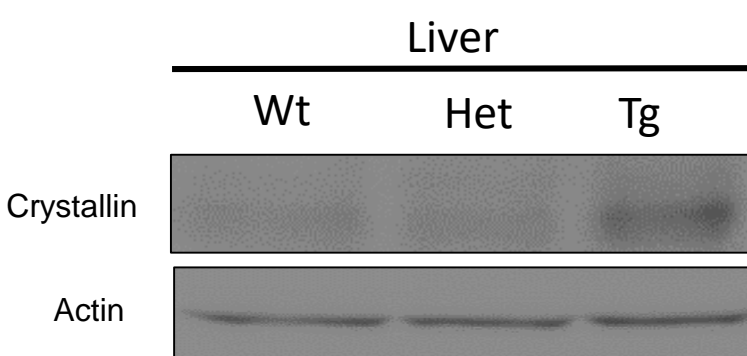

**d**

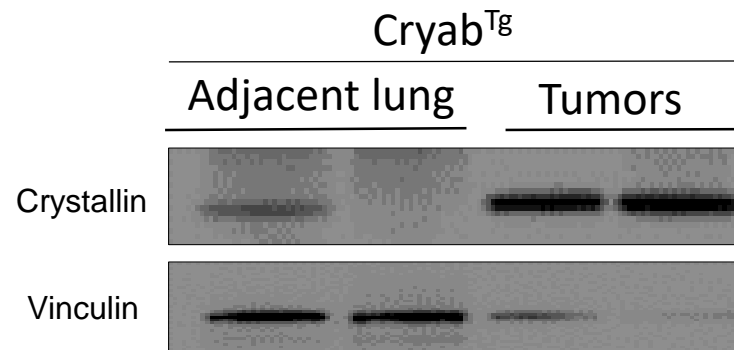

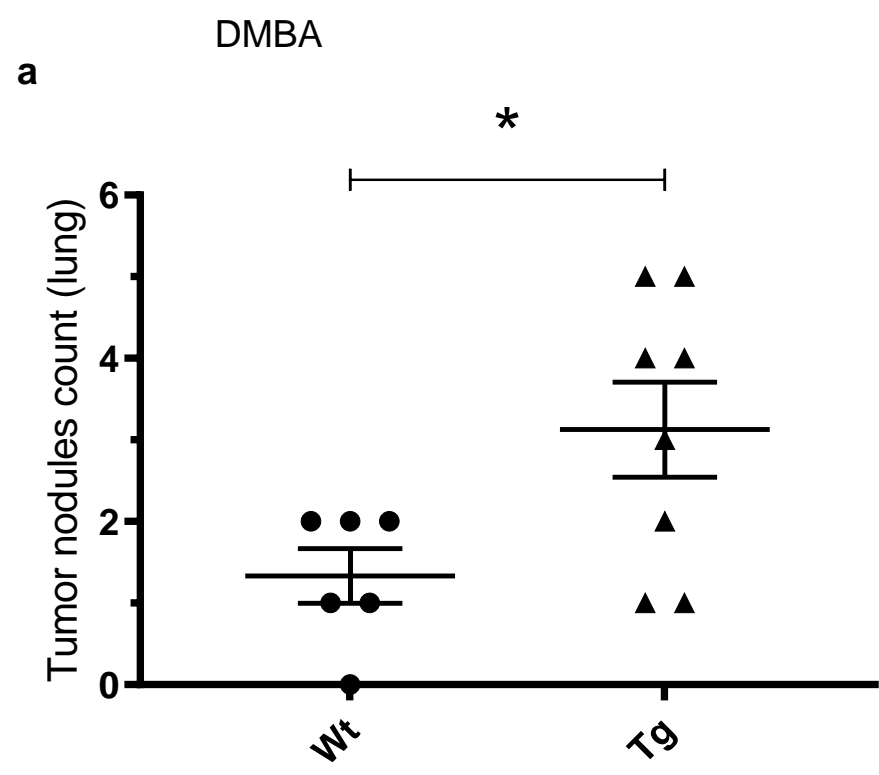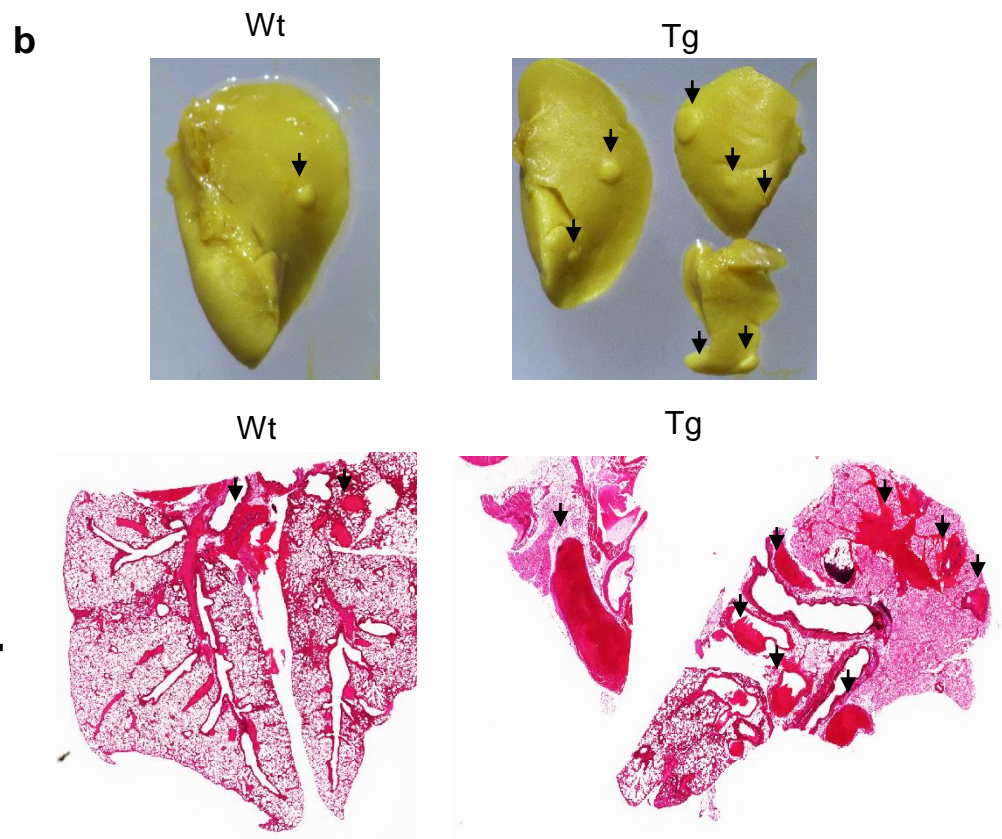



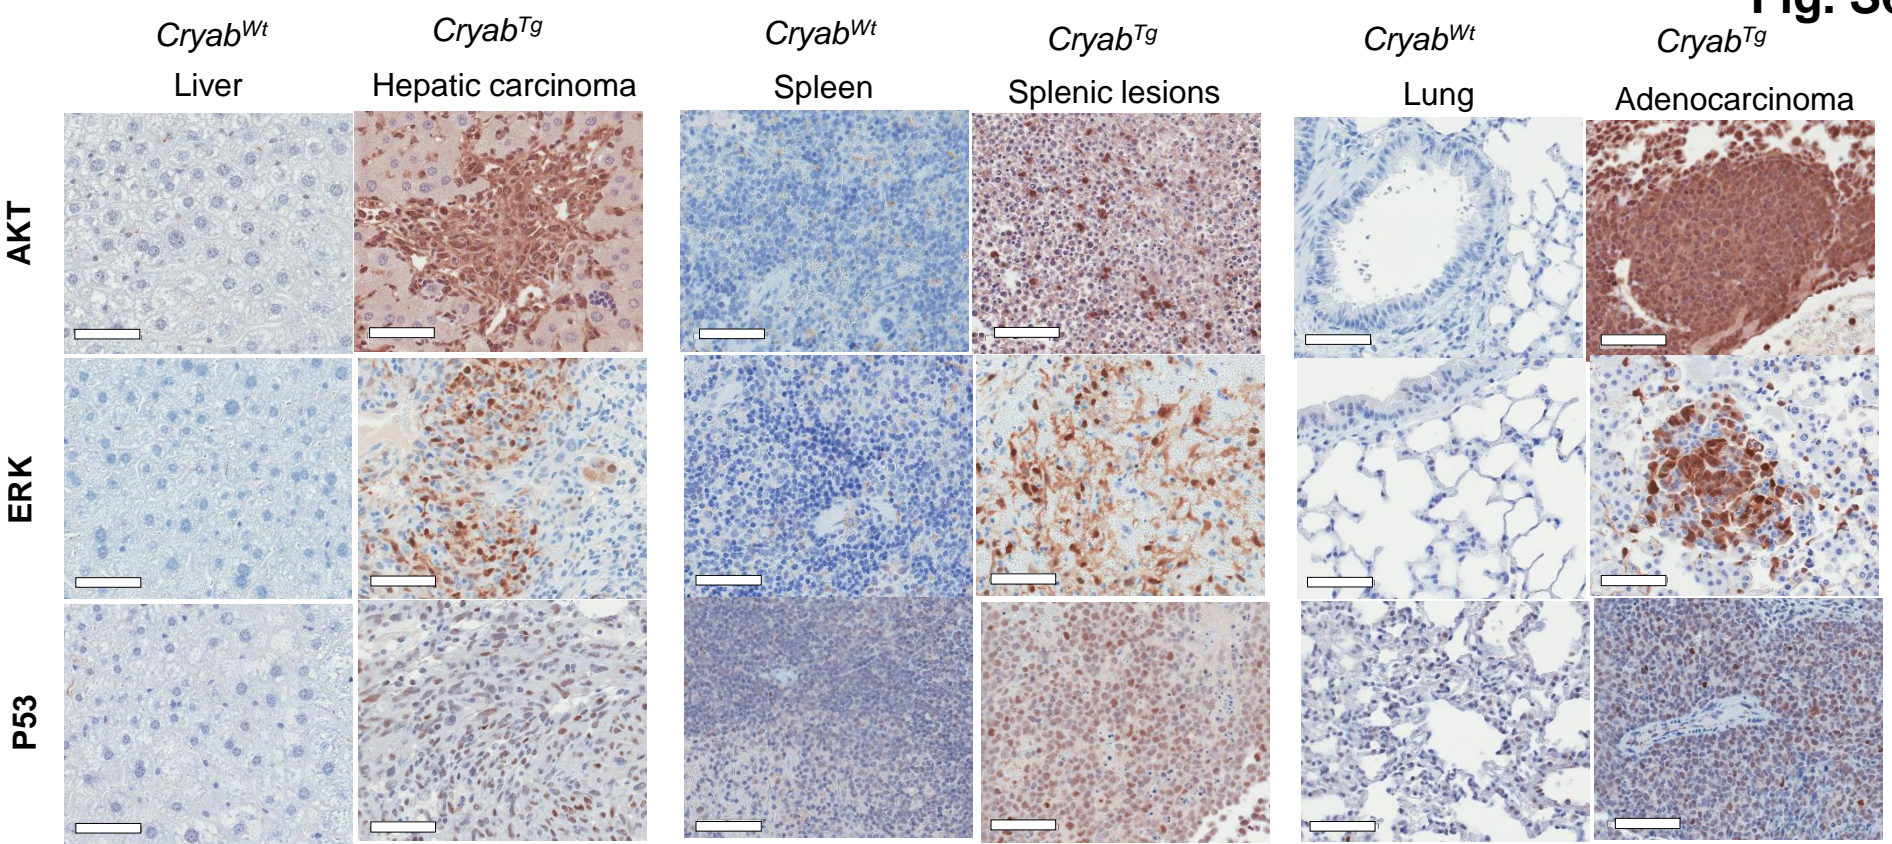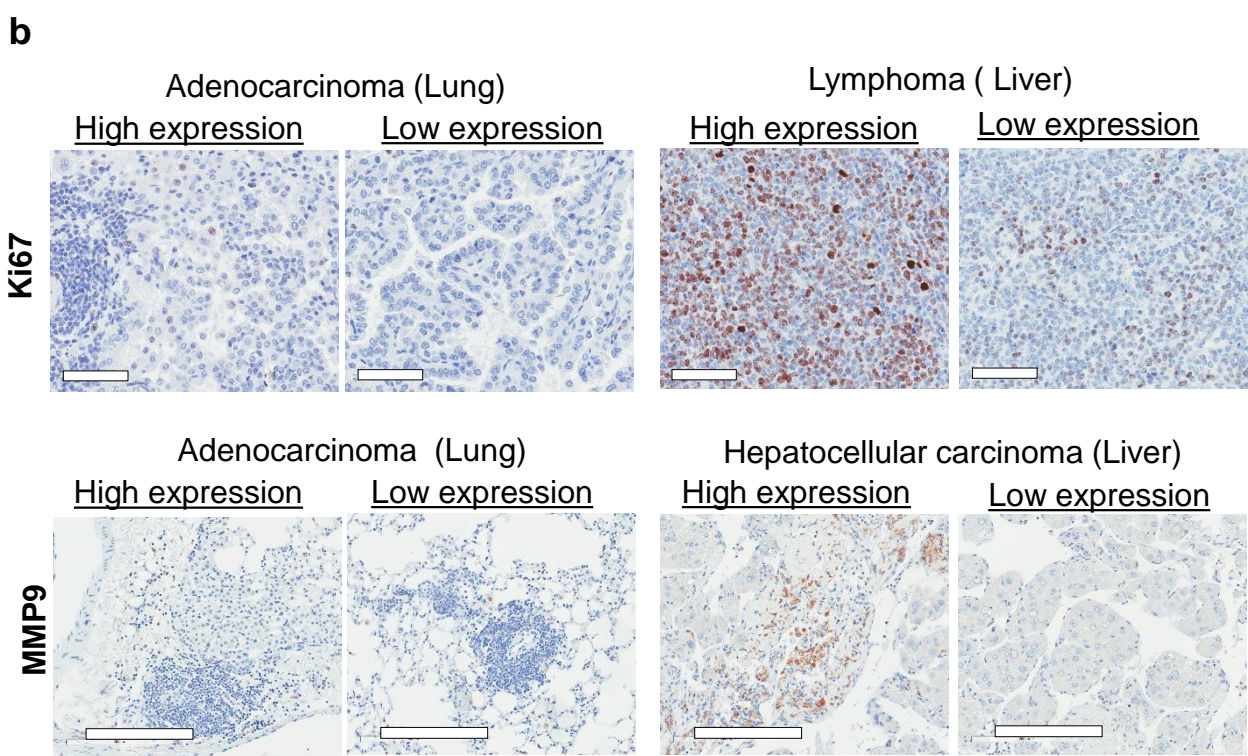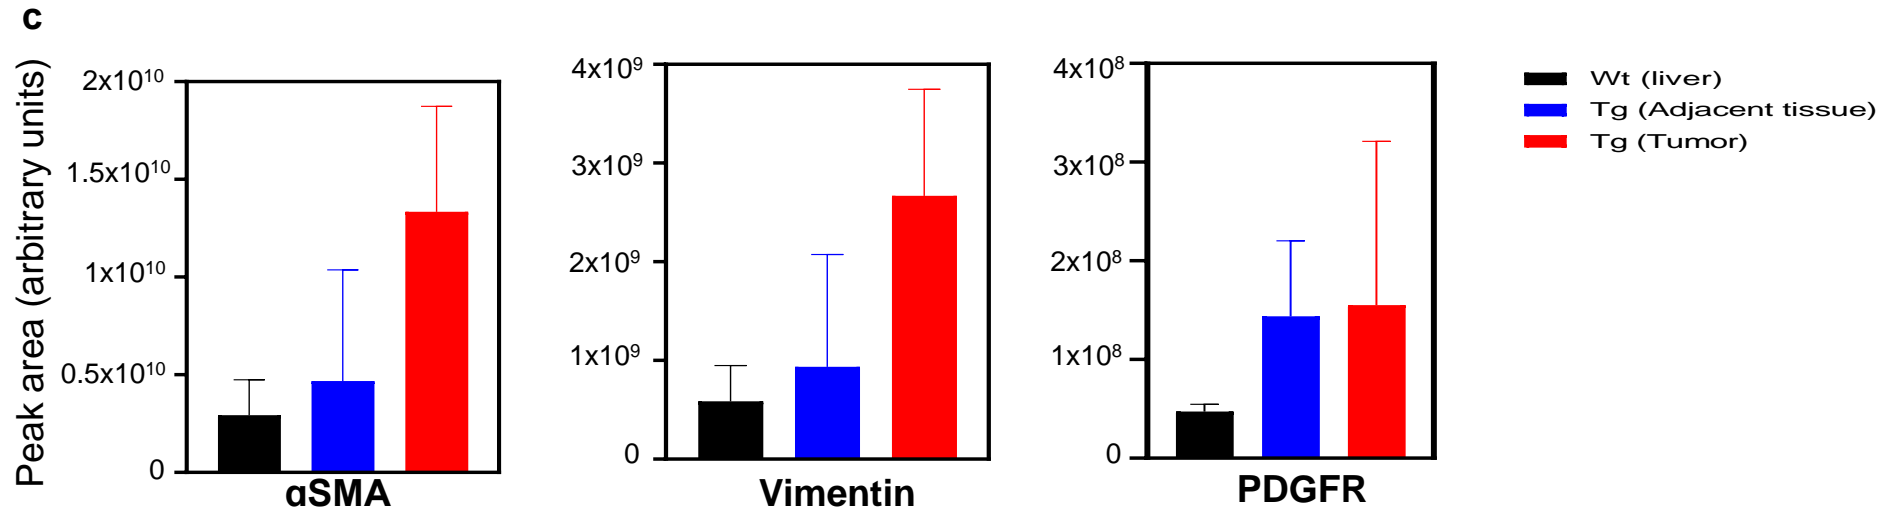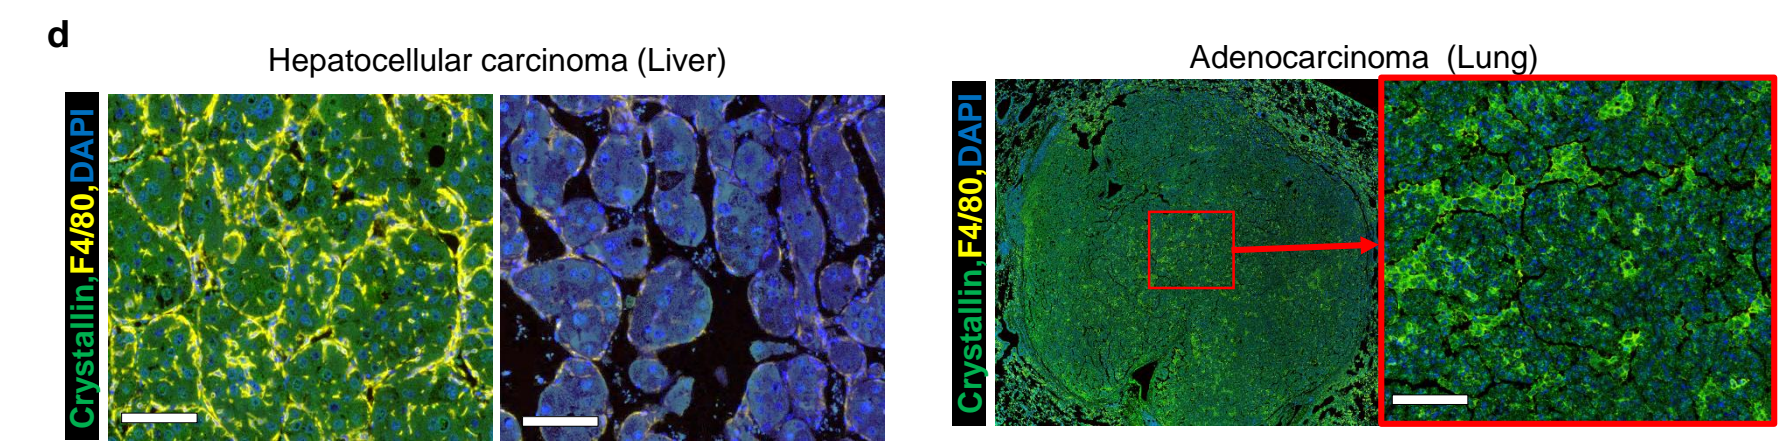



**a**

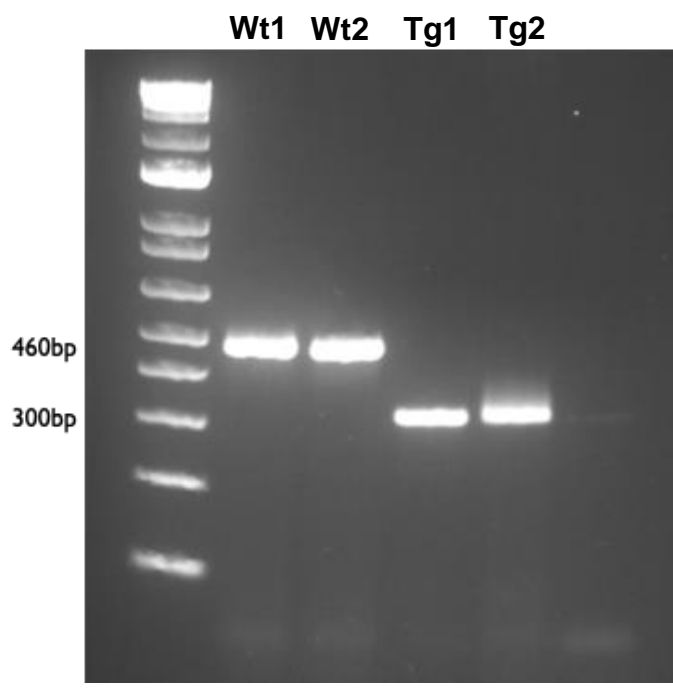

**b**

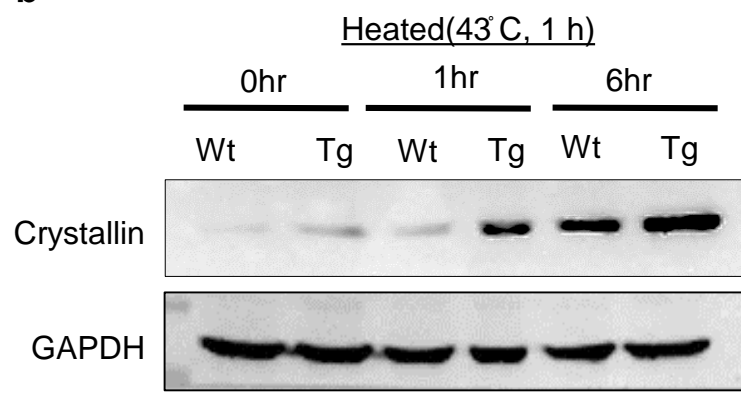



Biological processes

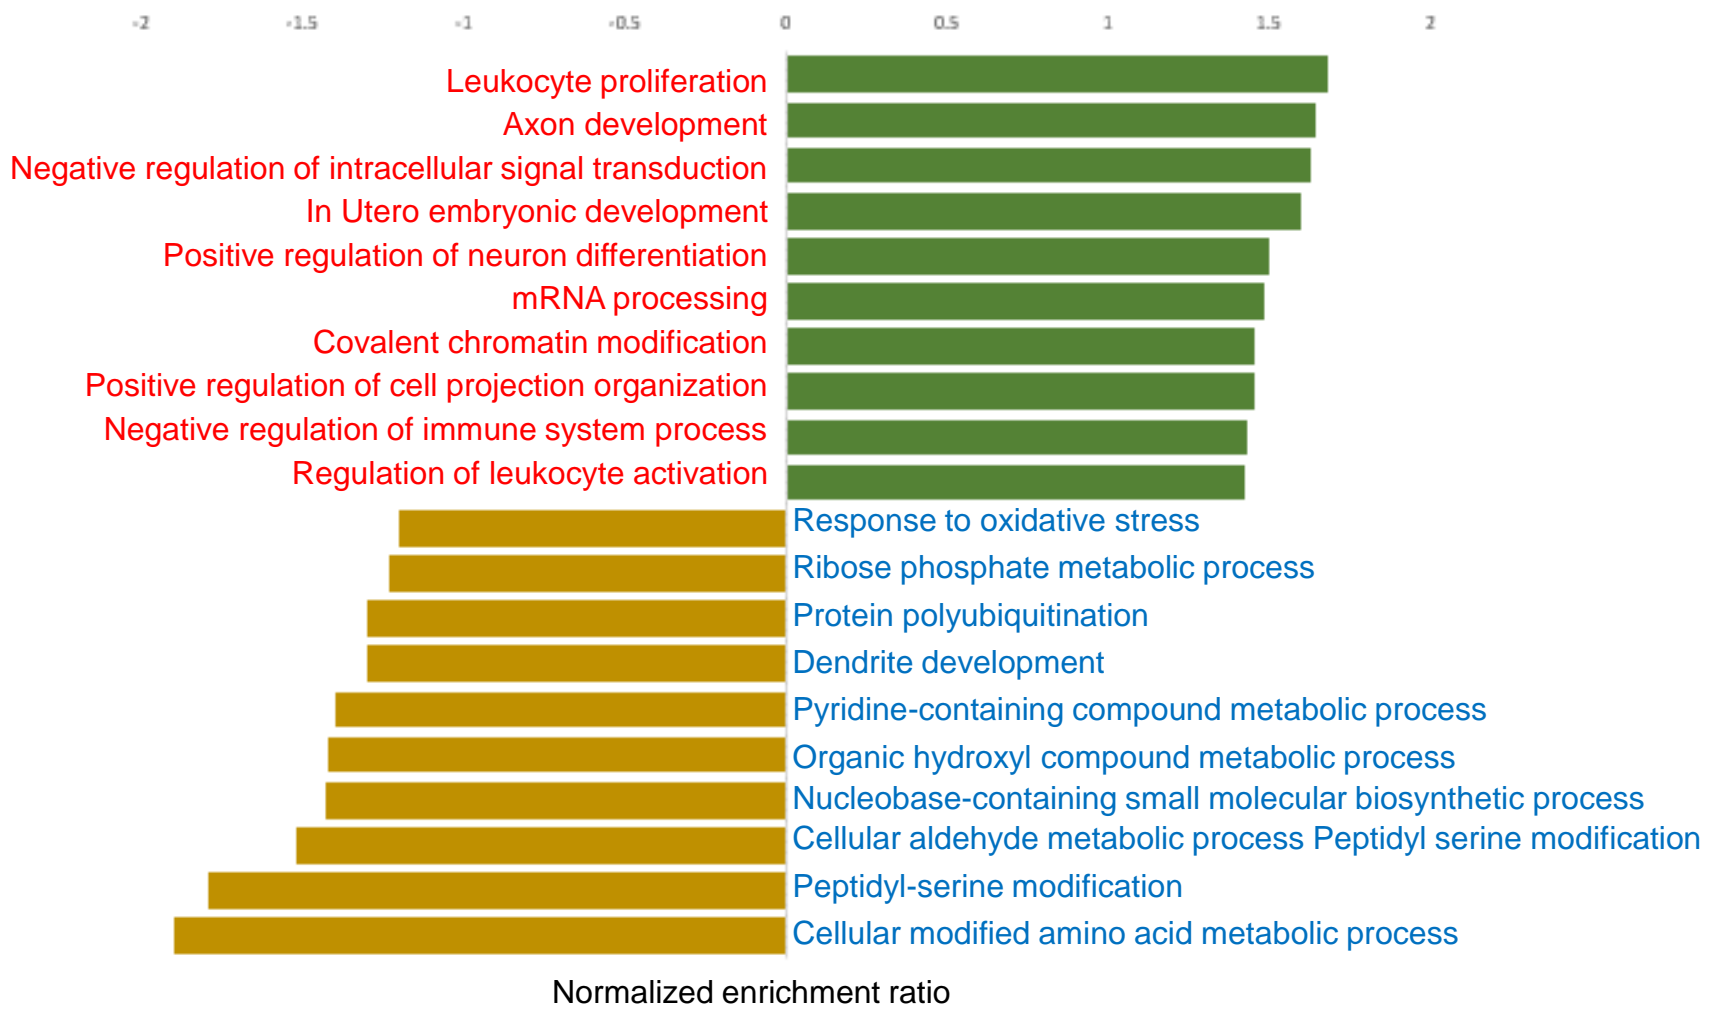

Normalized enrichment ratio

b

|            |                                             |                                                                      |
|------------|---------------------------------------------|----------------------------------------------------------------------|
| <b>Bsg</b> | <b>Basigin</b>                              | Extracellular matrix metalloproteinase inducer (EMMPRIN) or (CD147): |
| Crabp2     | Cellular retinoic acid-binding protein 2    | Role in metastasis of lung cancer is unclear.                        |
| Hells      | Lymphocyte-specific helicase                | Elevated expression in aggressive metastatic tumor                   |
| Sar1b      | GTP-binding protein SAR1b                   | Associated with shorter overall survival time in patients with CRC.  |
| Eif4b      | Eukaryotic translation initiation factor 4B | The chemo-resistance and metastasis characteristics of NSCLC         |

c

| Co-occurrence Analysis |       |         |         |
|------------------------|-------|---------|---------|
| A                      | B     | p-Value | q-Value |
| CRYAB                  | BSG   | <0.001  | <0.001  |
| CRYAB                  | HELLS | <0.001  | <0.001  |
| BSG                    | EIF4B | <0.001  | <0.001  |
| CRABP2                 | HELLS | 0.005   | 0.012   |
| HELLS                  | EIF4B | <0.001  | <0.001  |
| HELLS                  | SAR1B | <0.001  | <0.001  |
| SAR1B                  | EIF4B | 0.006   | 0.012   |

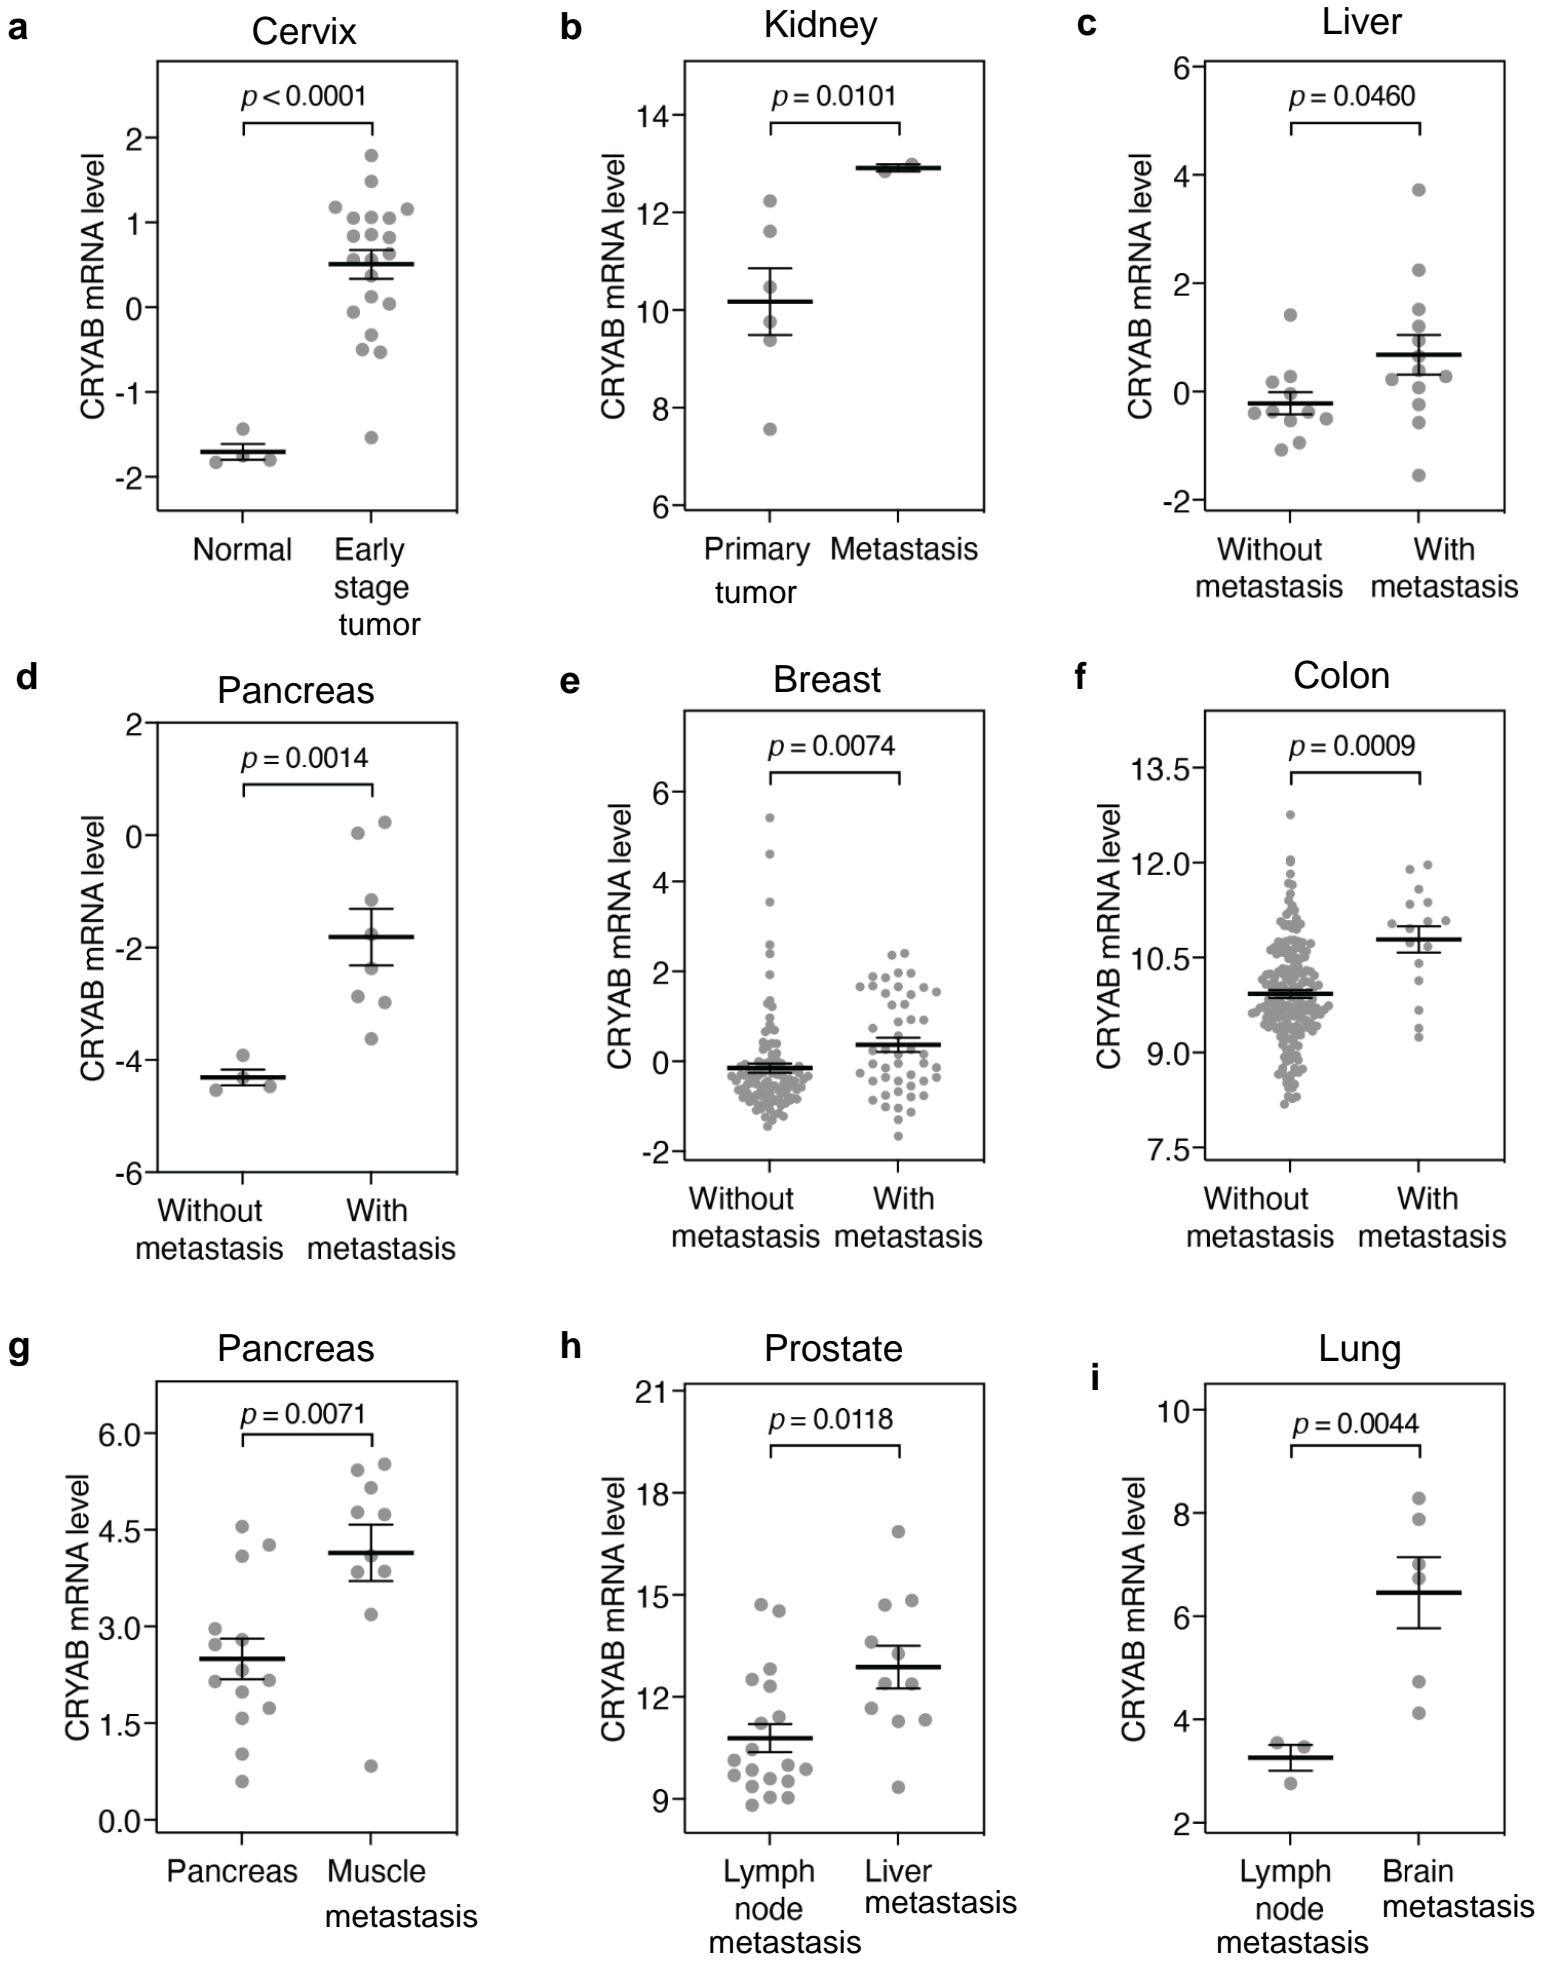

**j**

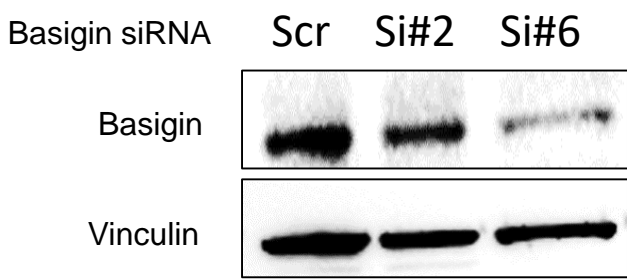

Supplement: MOESM1 [file 23903466]
